# Supplementary material for: Functional MICA Variants Are Differentially Associated with Immune-Mediated Inflammatory Diseases
Source: MDPI journal article supplement (doi:10.3390/ijms25053036), 2024-03-06
Supplement: s1 [file s1]

**Supplemental Table S1. *MICA* non-synonymous cSNPs and major alleles identified in Taiwanese normal healthy controls and immune mediated diseases patients**

| Residue<br>Position     | SNP ID<br>Number | Codon<br>Changes                                 | Exon   | MICA Allele |     |     |     |     |     |     |     |     |     |     |
|-------------------------|------------------|--------------------------------------------------|--------|-------------|-----|-----|-----|-----|-----|-----|-----|-----|-----|-----|
|                         |                  |                                                  |        | 001*        | 002 | 008 | 009 | 010 | 019 | 045 | 007 | 004 | 033 | 012 |
| <u>6R&gt;P</u>          | rs9380254        | <u>C</u> <del>G</del> / <u>C</u> <del>C</del> T  | Exon 2 | G           | -   | -   | -   | C   | -   | -   | -   | -   | -   | -   |
| <u>14W&gt;G</u>         | rs1063630        | <u>T</u> <del>G</del> G/ <u>G</u> <del>G</del> G | Exon 2 | T           | G   | -   | -   | -   | -   | -   | -   | -   | -   | -   |
| <u>24A&gt;T</u>         | rs1051785        | <u>G</u> <del>C</del> T/ <u>A</u> <del>C</del> T | Exon 2 | A           | G   | G   | G   | G   | G   | G   | G   | G   | G   | -   |
| <u>36Y&gt;C</u>         | rs1051786        | <u>T</u> <del>A</del> T/ <u>T</u> <del>G</del> T | Exon 2 | G           | -   | A   | A   | A   | A   | -   | -   | A   | A   | -   |
| <u>122L&gt;V</u>        | rs1051790        | <u>C</u> <del>T</del> G/ <u>G</u> <del>T</del> G | Exon 3 | C           | -   | -   | G   | -   | -   | -   | -   | G   | -   | -   |
| <u>124T&gt;S</u>        | rs41539919       | <u>A</u> <del>C</del> T/ <u>T</u> <del>C</del> T | Exon 3 | A           | -   | -   | -   | -   | -   | -   | -   | -   | T   | -   |
| <u>**125E&gt;K</u>      | <b>rs1051791</b> | <u>G</u> <del>A</del> G/ <u>A</u> <del>A</del> G | Exon 3 | A           | G   | G   | G   | G   | G   | G   | G   | G   | G   | G   |
| <u>129V&gt;M</u>        | rs1051792        | <u>G</u> <del>T</del> G/ <u>A</u> <del>T</del> G | Exon 3 | A           | -   | G   | G   | G   | G   | -   | -   | G   | G   | -   |
| <u>156H&gt;L</u>        | rs3819268        | <u>C</u> <del>A</del> C/ <u>C</u> <del>T</del> C | Exon 3 | A           | -   | -   | -   | -   | -   | -   | -   | -   | -   | T   |
| <u>173E&gt;K</u>        | rs1051794        | <u>G</u> <del>A</del> A/ <u>A</u> <del>A</del> A | Exon 3 | A           | -   | G   | G   | G   | G   | -   | -   | G   | G   | -   |
| <u>175G&gt;S</u>        | rs1131896        | <u>G</u> <del>G</del> C/ <u>A</u> <del>G</del> C | Exon 3 | G           | -   | -   | A   | A   | A   | -   | -   | A   | A   | -   |
| <u>181T&gt;R</u>        | rs1131897        | <u>A</u> <del>C</del> A/ <u>A</u> <del>G</del> A | Exon 3 | C           | -   | -   | -   | -   | -   | -   | -   | G   | -   | -   |
| <b><u>206S&gt;G</u></b> | rs1131898        | <u>A</u> <del>G</del> C/ <u>G</u> <del>G</del> C | Exon 4 | G           | -   | A   | A   | A   | A   | A   | -   | A   | A   | -   |
| <b><u>210R&gt;W</u></b> | rs1051798        | <u>C</u> <del>G</del> G/ <u>T</u> <del>G</del> G | Exon 4 | T           | -   | C   | C   | C   | C   | C   | -   | C   | C   | -   |
| <u>213I&gt;T</u>        | rs1140700        | <u>A</u> <del>T</del> A/ <u>A</u> <del>C</del> A | Exon 4 | C           | -   | T   | C   | T   | T   | T   | -   | -   | -   | -   |
| <b><u>215S&gt;T</u></b> | rs1051799        | <u>A</u> <del>C</del> C/ <u>A</u> <del>G</del> C | Exon 4 | G           | -   | C   | C   | C   | C   | C   | -   | C   | C   | -   |
| <u>251Q&gt;R</u>        | rs1063635        | <u>C</u> <del>A</del> A/ <u>C</u> <del>G</del> A | Exon 4 | A           | -   | G   | -   | G   | G   | -   | -   | -   | G   | -   |

\*MICA\*001 allele was listed as the reference allele for the nucleotide sequence comparison with other MICA alleles that had allele frequency >1% in the combined population of Taiwanese normal controls and AS patients as shown in the Table 1.

\*\*rs1051791 that causes amino acid (aa) substitution at the residue 125 was not detected in Taiwanese but is listed to compare the nucleotide differences between MICA\*001 and major MICA alleles identified in Taiwanese. Non-conservative residue changes are underlined. Residue substitutions that define two MICA lineages are in bold.
